# Supplementary material for: Polyphasic Assessment of Aflatoxin Production Potential in Selected Aspergilli
Source: PubMed Central journal article supplement (PMC6950480; doi:10.3390/toxins11120692), 2019-11-26
Supplement: toxins-11-00692-s001.pdf [file toxins-11-00692-s001.pdf]

## Supplementary Materials: Polyphasic Assessment of Aflatoxin Production Potential in Selected *Aspergilli*

Stephen Abiola Akinola, Collins Njie Ateba and Mulunda Mwanza

Table S1. PCR Conditions for Amplification of Aflatoxin Biosynthesis Genes.

| S/N | Target Gene          | Primer sets (5'-3')                  |                                      | PCR Process                                                                                                 | Conditions                                                                                                 | Amplicon Size |
|-----|----------------------|--------------------------------------|--------------------------------------|-------------------------------------------------------------------------------------------------------------|------------------------------------------------------------------------------------------------------------|---------------|
|     |                      | Forward                              | Reverse                              |                                                                                                             |                                                                                                            |               |
| 1   | <i>AflR</i>          | TAT CTC CCC CCG GGC ATC TCC<br>CGG   | CCG TCA GAC AGC CAC TGG ACA<br>CGG   | Pre-denaturation<br>Denaturation<br>Annealing<br>Extension (cycles)<br>Final elongation<br>Hold temperature | 95 °C, 4 min<br>95 °C, 1 min<br>60 °C, 1 min<br>72 °C, 30 s (30 cycles)<br>72 °C, 10 min (1 cycle)<br>4 °C | 1032 bp       |
| 2   | <i>aflJ</i>          | TGA ATC CGT ACC CTT TGA GG-          | GGA ATG GGA TGG AGA TGA GA           | Pre-denaturation<br>Denaturation<br>Annealing<br>Extension (cycles)<br>Final elongation<br>Hold temperature | 95 °C, 10 min<br>95 °C, 50 s<br>58 °C, 50 s<br>72 °C, 2 min (30cycles)<br>72 °C, 10 min (1 cycle)<br>4 °C  | 737 bp        |
| 3   | <i>aflD</i><br>(Nor) | ACC GCT ACG CCG GCA CTC TCG<br>GCA C | GTT GGC CGC CAG CTT CGA CAC<br>TCC G | Pre-denaturation<br>Denaturation<br>Annealing<br>Extension (cycles)<br>Final elongation<br>Hold temperature | 94 °C, 10 min<br>94 °C, 1 min<br>65 °C, 1 min<br>72 °C, 2 min (33cycles)<br>72 °C, 5 min (1 cycle)<br>4 °C | 400 bp        |
| 4   | <i>aflM</i>          | GCC GCA GGC CGC GGA GAA AGT<br>GGT   | GGG GAT ATA CTC CCG CGA CAC<br>AGC C | Pre-denaturation<br>Denaturation<br>Annealing                                                               | 95 °C, 4 mins<br>95 °C, 1 min<br>58 °C, 1 min                                                              | 537 bp        |

|   |       |                                      |                                      |                    |                          |        |
|---|-------|--------------------------------------|--------------------------------------|--------------------|--------------------------|--------|
|   |       |                                      |                                      | Extension (cycles) | 72 °C, 30 s (30 cycles)  |        |
|   |       |                                      |                                      | Final elongation   | 72 °C, 10 mins (1 cycle) |        |
|   |       |                                      |                                      | Hold temperature   | 4 °C                     |        |
| 5 | Omt-A | GTG GAC GGA CCT AGT CCG ACA<br>TCA C | GTC GGC GCC ACG CAC TGG GTT<br>GGG G | Pre-denaturation   | 94 °C, 5 min             | 797 bp |
|   |       |                                      |                                      | Denaturation       | 94 °C, 1 min             |        |
|   |       |                                      |                                      | Annealing          | 75 °C, 2 mins            |        |
|   |       |                                      |                                      | Extension (cycles) | 72 °C, 2 min (33cycles)  |        |
|   |       |                                      |                                      | Final elongation   | 10 min (1 cycle)         |        |
|   |       |                                      |                                      | Hold temperature   | 4 °C                     |        |

Adapated from Adetunji *et al.* (2019).
